# Supplementary material
Source: MDPI journal article supplement (https://www.mdpi.com/2071-1050/16/2/909)
Supplement: s1 [file s1 › sustainability-2791932-supplementary.pdf]

## Supplementary Material

### Section S1. Spatial distribution of indicators covered by the ER assessment

The indicators involved in the ER assessment, normalized to the results shown below:

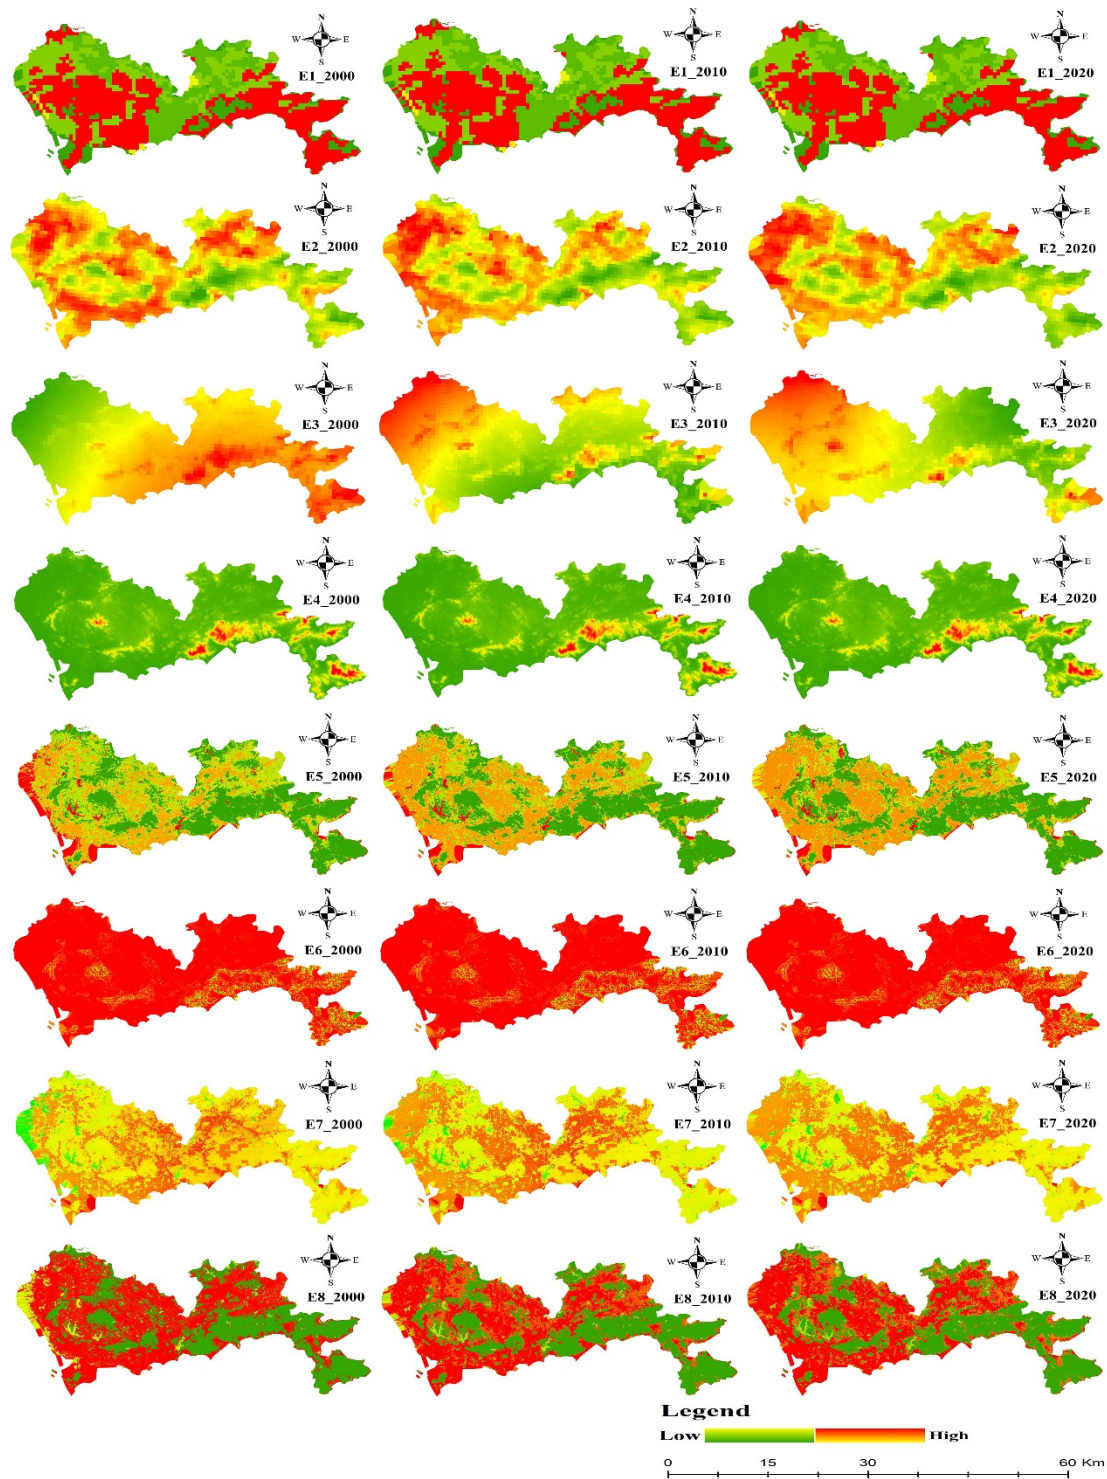

Figure S1. Results after standardization of indicators covered by ecological subsystems.

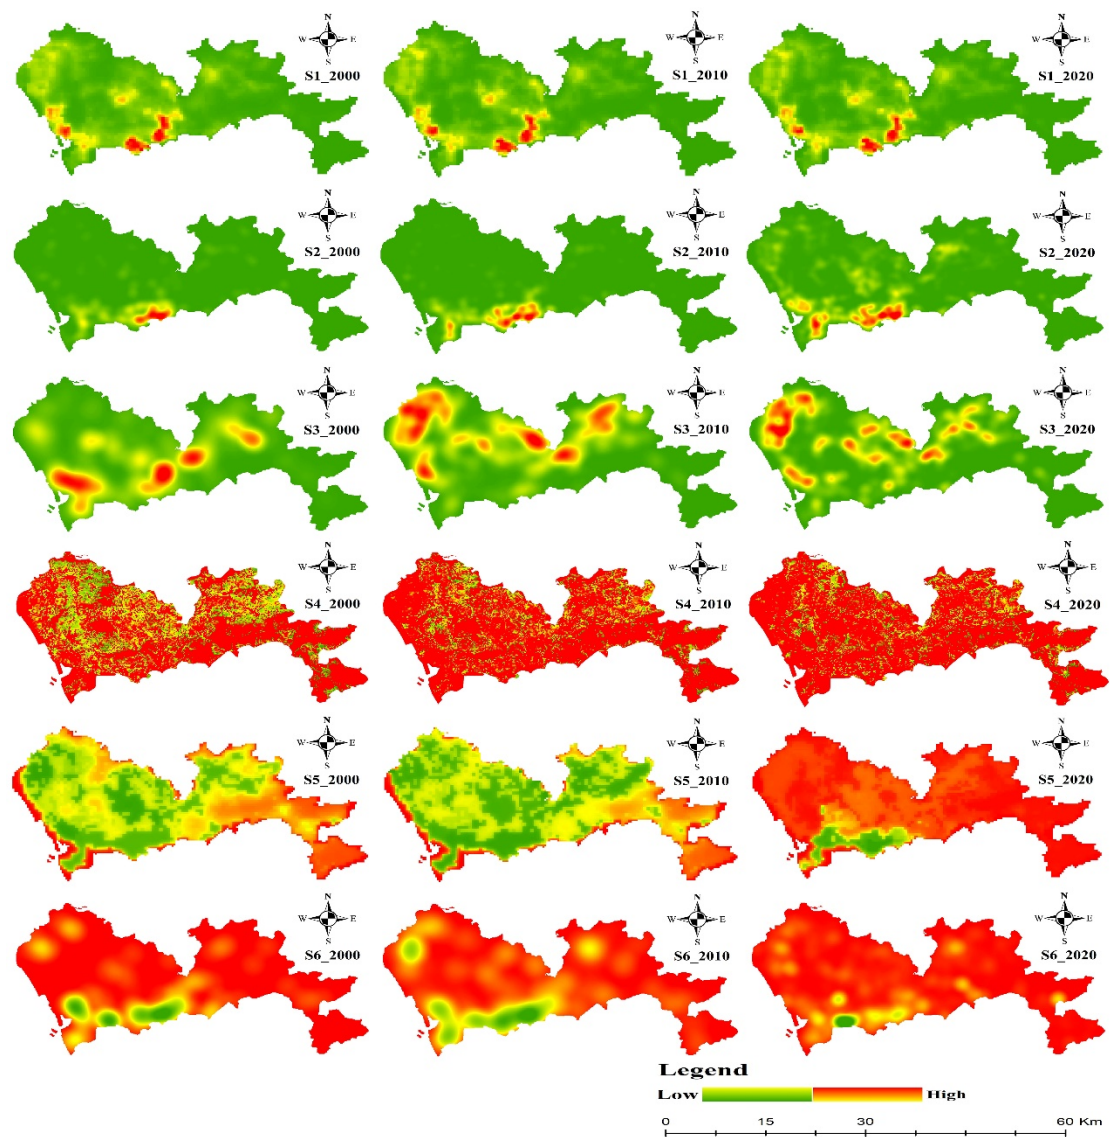

**Figure S2.** Results after standardization of the indicators covered by the social subsystems.

**Section S2.** Uncertainty of sample points in the ER and its subsystems in 2010 and 2020.

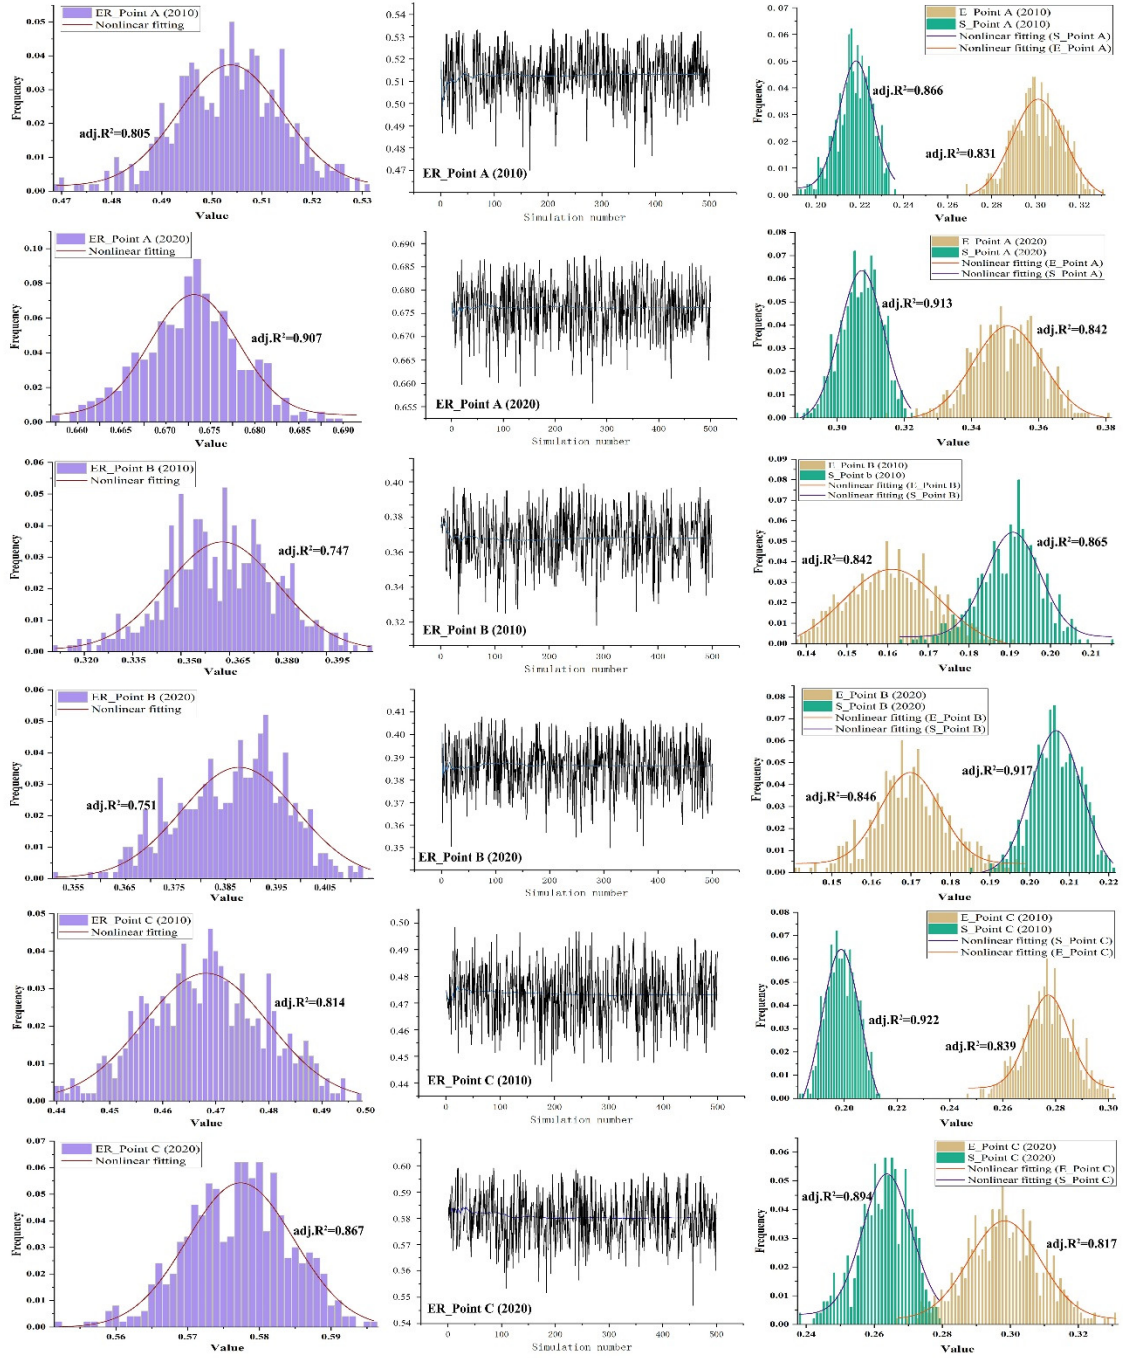

Figure S3. Uncertainty of sample points in the ER and its subsystems (2010 and 2020).
